# Supplementary material for: Do Vascular Networks Branch Optimally or Randomly across Spatial Scales?
Source: PubMed Central journal article supplement (PMC5130167; doi:10.1371/journal.pcbi.1005223), 2016-11-30

**S3 Fig. Heat map (color map) representation of the equivalent impedance (i.e.,  $Z_{eq}$ ) for PC-0 (power-cost optimization for a single branching junction).** The optimal branching location, J, for different choice of cost parameters ( $h_i$ ) and end points ( $V_i$ ) is marked with a green dot. The optimal branching junction coincides with the end point  $V_0$  in panel (a),  $V_1$  in panel (b), and  $V_2$  in panel (c). This highlights the fact that, depending on both the vessel cost and the geometry of the endpoints, the branching junction can collapse on the parent or either of the daughter vessel endpoints.

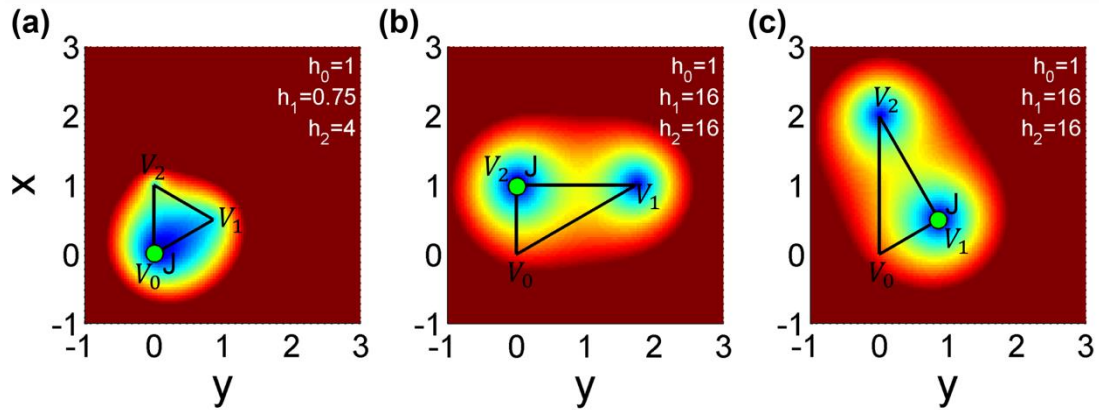

Supplement: pcbi.1005223.s004.pdf [file pcbi.1005223.s004.pdf]
