# Supplementary material for: Do Vascular Networks Branch Optimally or Randomly across Spatial Scales?
Source: PubMed Central journal article supplement (PMC5130167; doi:10.1371/journal.pcbi.1005223), 2016-11-30

**S5 Fig. Histogram of branching angles and optimal branching angles of MC (material-cost) optimizations for mouse and human networks. All histograms show a unimodal distribution with means given by the red vertical lines.**

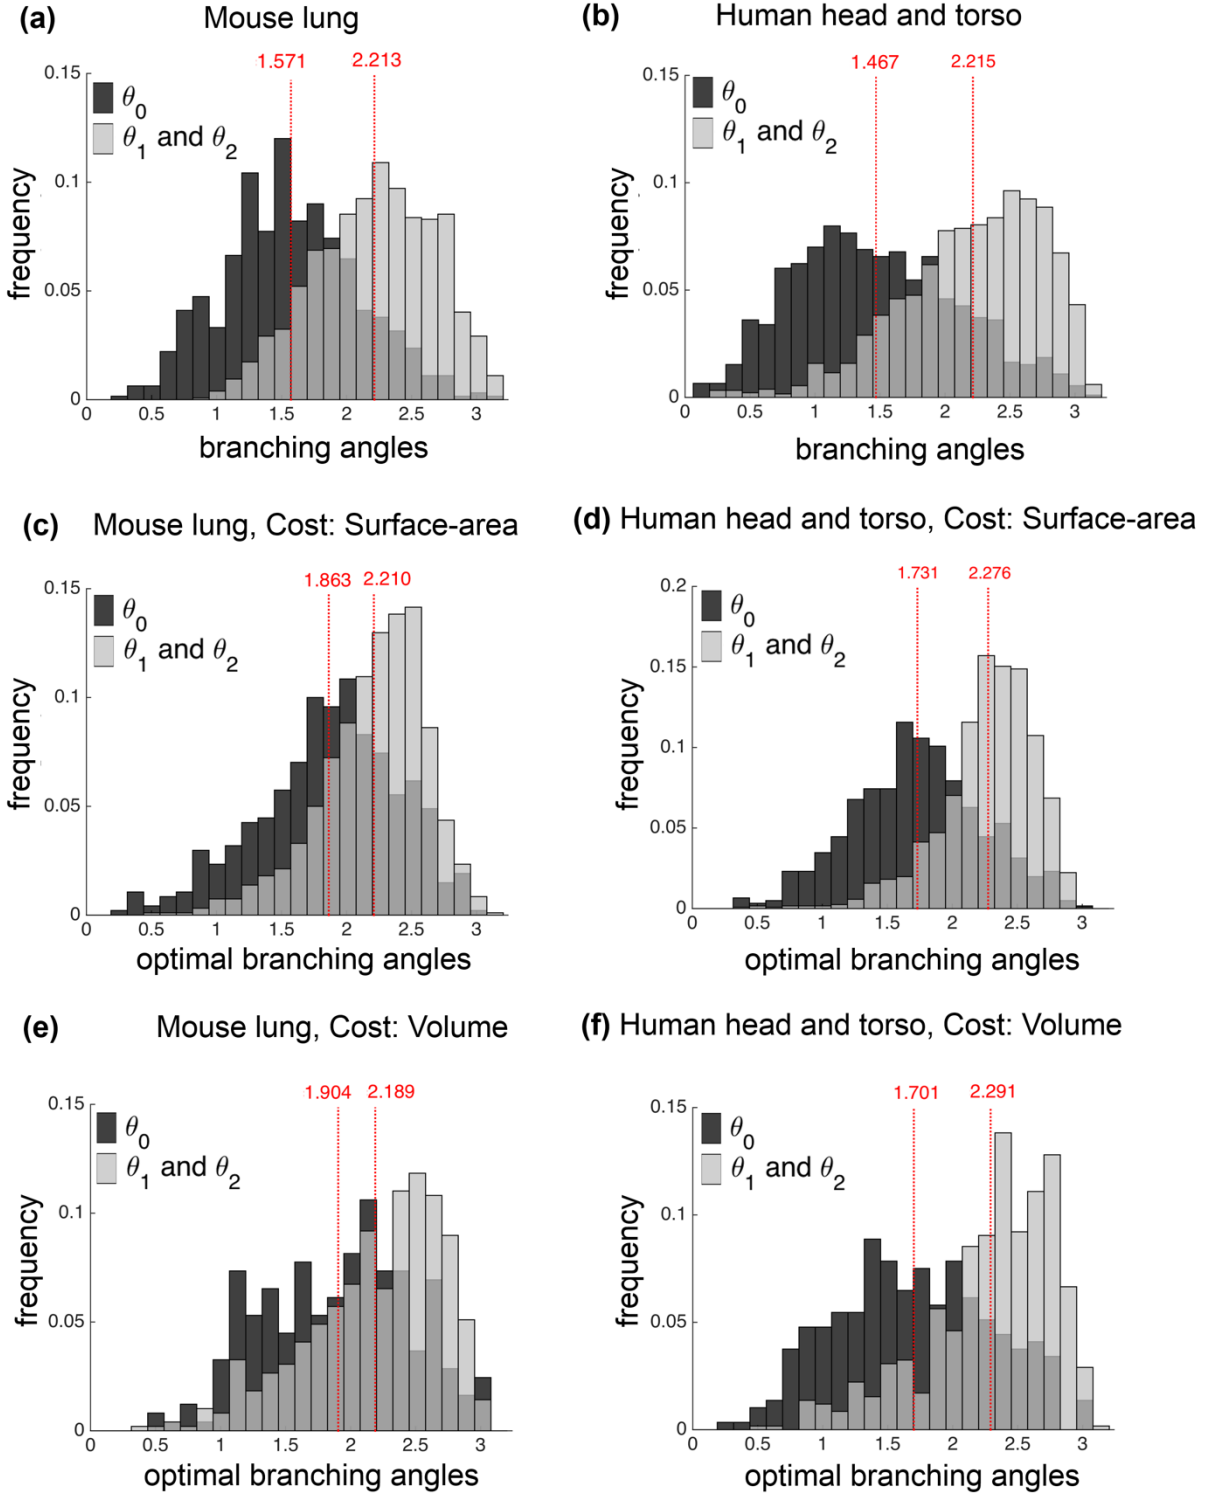

Supplement: pcbi.1005223.s006.pdf [file pcbi.1005223.s006.pdf]
