# Supplementary material for: Do Vascular Networks Branch Optimally or Randomly across Spatial Scales?
Source: PubMed Central journal article supplement (PMC5130167; doi:10.1371/journal.pcbi.1005223), 2016-11-30

**S6 Fig. Fraction of degenerate and non-degenerate branching solutions for material-cost optimizations.** The surface-area constraint leads to degenerate solutions for **(a)** 26% (=163/633) of branching junctions in the mouse lung network and **(b)** 34% (=292/849) of branching junctions for the human head and torso network. Volume constraint leads to degenerate solutions for **(c)** 61% (=388/633) of branching junctions in the mouse lung network and **(d)** 68% (576=849) of branching junctions for the human head and torso network.

**(a)** Mouse lung, Cost: Surface-area    **(b)** Human head and torso, Cost: Surface-area

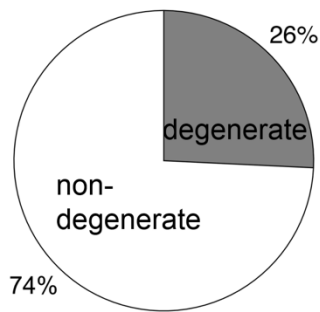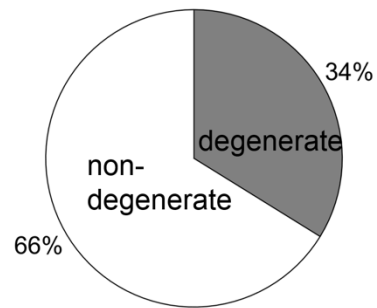

**(c)** Mouse lung, Cost: Volume

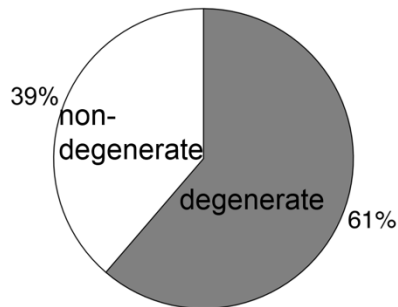

**(d)** Human head and torso, Cost: Volume

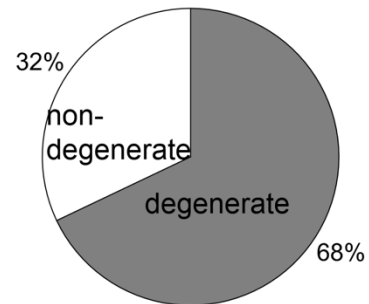

Supplement: pcbi.1005223.s007.pdf [file pcbi.1005223.s007.pdf]
