# Supplementary material for: Do Vascular Networks Branch Optimally or Randomly across Spatial Scales?
Source: PubMed Central journal article supplement (PMC5130167; doi:10.1371/journal.pcbi.1005223), 2016-11-30

**S7 Fig. Junction-level comparison of optimal versus actual branching angles for the surface-area constraint of material-cost optimizations.** Results for (a) mouse lung and (b) human head and torso. The Pearson correlation coefficients are calculated for each plot.

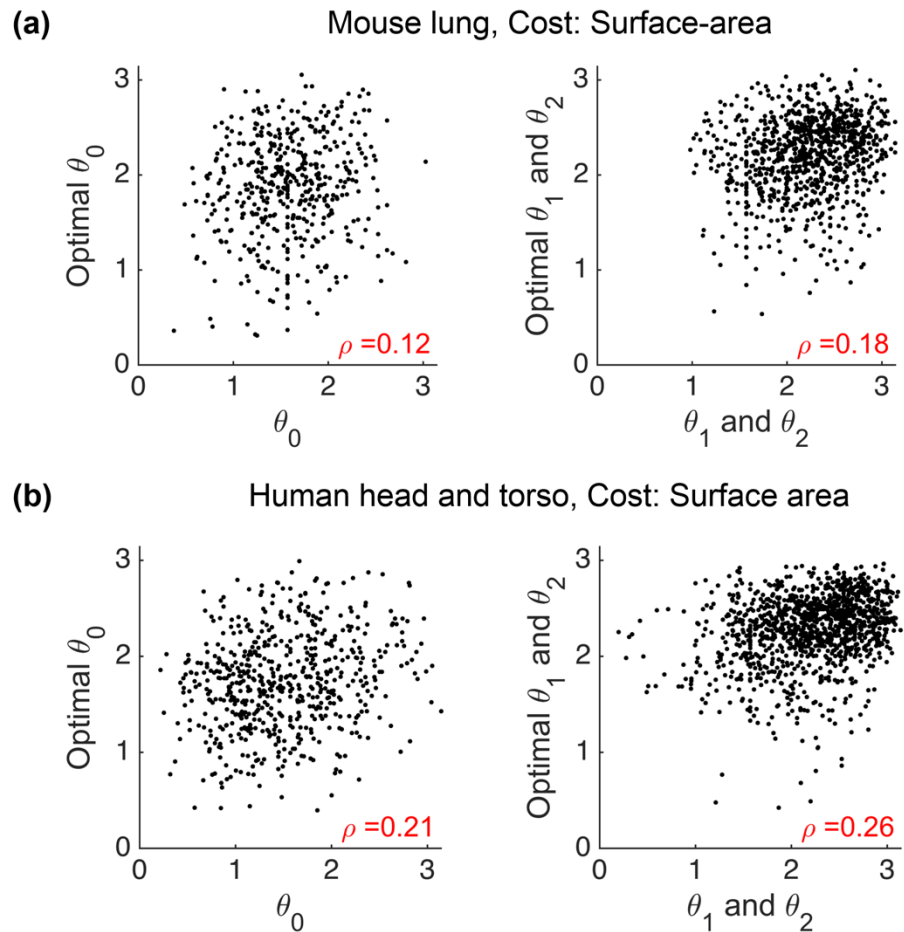

Supplement: pcbi.1005223.s008.pdf [file pcbi.1005223.s008.pdf]
