# Supplementary material for: Do Vascular Networks Branch Optimally or Randomly across Spatial Scales?
Source: PubMed Central journal article supplement (PMC5130167; doi:10.1371/journal.pcbi.1005223), 2016-11-30

**S9 Fig. Computing branching angles from extracted vessel skeleton.** We calculate branching angles as angles between the straight lines defined by the positional coordinates of the vessels—the endpoint coordinates  $V_0$ ,  $V_1$ ,  $V_2$ , and  $J$ —at the bifurcation.

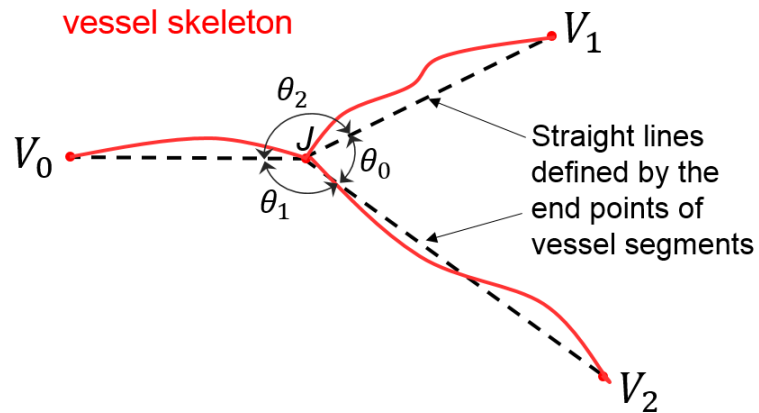

Supplement: pcbi.1005223.s010.pdf [file pcbi.1005223.s010.pdf]
