# Supplementary material for: Do Vascular Networks Branch Optimally or Randomly across Spatial Scales?
Source: PubMed Central journal article supplement (PMC5130167; doi:10.1371/journal.pcbi.1005223), 2016-11-30
Supplement: pcbi.1005223.s011.pdf [file pcbi.1005223.s011.pdf]

|                         | <b>Newberry<br/>et al.</b> | <b>this study</b> |
|-------------------------|----------------------------|-------------------|
| Angicart GitHub version | 83df119                    | ab81935           |
| human subject 1         | 0.28                       | 0.30              |
| human subject 2         | 0.34                       | 0.35              |
| human subject 3         | 0.68                       | 0.70              |
| human subject 4         | 0.65                       | 0.65              |
| human subject 5         | 0.76                       | 0.75              |
| human subject 6         | 0.88                       | 0.90              |
| human subject 7         | 0.40                       | 0.40              |
| human subject 8         | 0.63                       | 0.65              |
| human subject 9         | 0.65                       | 0.65              |
| human subject 10        | 0.78                       | 0.80              |
| human subject 11        | 0.70                       | 0.70              |
| human subject 12        | 0.31                       | 0.30              |
| human subject 13        | 0.67                       | 0.65              |
| human subject 14        | 0.70                       | 0.70              |
| human subject 15        | 0.64                       | 0.65              |
| human subject 16        | 0.34                       | 0.35              |
| human subject 17        | 0.50                       | 0.50              |
| human subject 18        | 0.51                       | 0.50              |
| mouse lung              | N/A                        | 0.90              |
