# Supplementary material for: Do Vascular Networks Branch Optimally or Randomly across Spatial Scales?
Source: PubMed Central journal article supplement (PMC5130167; doi:10.1371/journal.pcbi.1005223), 2016-11-30
Supplement: pcbi.1005223.s012.pdf [file pcbi.1005223.s012.pdf]

% of non-deformed vessels

|                                        |    |
|----------------------------------------|----|
| human head and torso (Newberry et al.) | 41 |
| human head and torso (this study)      | 58 |
| mouse lung (this study)                | 88 |
