# Supplementary material for: Do Vascular Networks Branch Optimally or Randomly across Spatial Scales?
Source: PubMed Central journal article supplement (PMC5130167; doi:10.1371/journal.pcbi.1005223), 2016-11-30
Supplement: pcbi.1005223.s013.pdf [file pcbi.1005223.s013.pdf]

Mean±SD

| Data                 | Cost            | $\theta_0$  | $\theta_1$ and $\theta_2$ |
|----------------------|-----------------|-------------|---------------------------|
| Combined data        | N/A (Real data) | 1.510±0.583 | 2.214±0.512               |
|                      | Surface-area    | 1.789±0.518 | 2.247±0.385               |
|                      | Volume          | 1.793±0.590 | 2.445±0.510               |
| Mouse lung           | N/A (Real data) | 1.571±0.513 | 2.213±0.460               |
|                      | Surface-area    | 1.863±0.536 | 2.210±0.406               |
|                      | Volume          | 1.904±0.566 | 2.189±0.521               |
| Human head and torso | N/A (Real data) | 1.467±0.624 | 2.215±0.546               |
|                      | Surface-area    | 1.731±0.497 | 2.276±0.366               |
|                      | Volume          | 1.701±0.594 | 2.291±0.495               |
