# Supplementary material for: Do Vascular Networks Branch Optimally or Randomly across Spatial Scales?
Source: PLoS Comput Biol. 2016 Nov 30;12(11):e1005223. doi: 10.1371/journal.pcbi.1005223 (PMC5130167; doi:10.1371/journal.pcbi.1005223)
Supplement: S1 Appendix — (PDF) [file pcbi.1005223.s001.pdf]

## Appendix A. Derivation of Length Asymmetry Ratio ( $\lambda_l$ ) Given Branching Angles,

Here, we relate the length asymmetry ratio ( $\lambda_l$ ) to the optimal branching solutions ( $\theta_i$ ) and the geometry of the unshared endpoints (i.e., the vertices  $V_i$ ). We denote the lengths of the sides of the triangle that correspond to  $V_1V_2$ ,  $V_0V_2$ , and  $V_0V_1$  as  $v_0$ ,  $v_1$ , and  $v_2$ , respectively (Fig A1). We first prove two Lemmas that lead to the derivation of the asymmetric length ratio.

**Lemma 1:** Let the intersection of the line between the points  $V_0$  and  $J$  with the line  $V_1V_2$  be called  $K$  and the angle defined by the three points  $V_0KV_1$  be called  $\psi$  (Fig A1). Using these definitions and the other labeling in Fig. A1, the following relationships holds

$$\frac{|V_1K|}{|V_2K|} = \frac{l_1 \sin \theta_2}{l_2 \sin \theta_1} = \frac{v_2 \sin \varphi_1}{v_1 \sin \varphi_2}$$

**Proof:** By the law of sines applied to the triangles  $V_0V_1K$  and  $V_0V_2K$ , we have:

$$\frac{\sin \psi}{v_2} = \frac{\sin \varphi_1}{|V_1K|}, \quad \frac{\sin(\pi - \psi)}{v_1} = \frac{\sin \varphi_2}{|V_2K|}$$

Since  $\sin(\pi - \psi) = \sin \psi$ , dividing these equations yields  $\frac{|V_1K|}{|V_2K|} = \frac{v_2 \sin \varphi_1}{v_1 \sin \varphi_2}$ . Applying a

similar approach to triangles  $JV_1K$  and  $JV_2K$ , we have  $\frac{|V_1K|}{|V_2K|} = \frac{l_1 \sin \theta_2}{l_2 \sin \theta_1}$ , as desired. ■

**Figure A1. (a)** Schematic of the branching geometry **(b)** Illustration of degenerate cases where the branching junction coincides with one of the vertices.

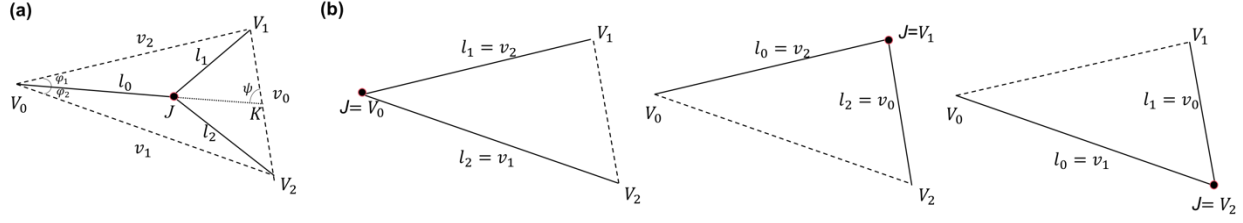

17

18 **Lemma 2:** The length asymmetry ratio ( $\lambda_l = \frac{l_1}{l_2}$ ) can be calculated purely in terms of the  
 19 lengths of the sides of  $v_1$  and  $v_2$  along with the angle  $\widehat{V_1V_0V_2}$  and the branching  
 20 angles  $\theta_1$  and  $\theta_2$  as

$$21 \quad \lambda_l = \frac{v_2 \sin \theta_1}{v_1 \sin \theta_2} \left( -\cos \widehat{V_1V_0V_2} + \sin \widehat{V_1V_0V_2} \cot(\widehat{V_1V_0V_2} + \gamma - \theta_2) \right)$$

$$22 \quad \text{where } \gamma = \cot^{-1} \left[ \frac{\frac{v_2 \sin \theta_1}{v_1 \sin \theta_2} + \cos(\theta_1 + \theta_2 - \widehat{V_1V_0V_2})}{\sin(\theta_1 + \theta_2 - \widehat{V_1V_0V_2})} \right]$$

23 **Proof:** By Lemma 1, we have

$$24 \quad \lambda_l = \frac{l_1}{l_2} = \frac{v_2 \sin \theta_1 \sin \varphi_1}{v_1 \sin \theta_2 \sin \varphi_2}$$

25 Then, by applying law of sines in a specific, successive order and also using sine  
 26 addition formulas, we express  $\frac{\sin \varphi_1}{\sin \varphi_2}$  in terms of known quantities and branching angles:

$$27 \quad \frac{\sin \varphi_1}{\sin \varphi_2} = \left( -\cos \widehat{V_1V_0V_2} + \sin \widehat{V_1V_0V_2} \cot(\widehat{V_1V_0V_2} + \gamma - \theta_2) \right)$$

28 proving the lemma. ■

With Lemma 2, we show that the branching angle solution—obtained by optimizing certain structural principles—also predicts the optimal value for the asymmetric length ratio.

## Appendix B. Coordinate-Free Framework for Material Cost Optimization Solutions

In this section, we introduce a coordinate-free framework for the minimization of the objective function, defined as  $H = \sum_i h_i l_i$ . We have not seen this approach in the literature, and other references have used methods that rely on specific choices of coordinate systems and complicated algebra (1-3). The solution is obtained via finding the stationary and singular points of the cost function  $H$  with respect to  $l_0$  (the parent vessel length) and  $\varphi_1$  (the angle of the parent vessel relative to its unshared endpoint  $V_0$ ) (Fig A1). Below, we provide two lemmas that will be used to determine  $\frac{\partial H}{\partial l_0}$  and  $\frac{\partial H}{\partial \varphi_1}$ .

**Lemma 3.** Given fixed endpoints  $V_0, V_1$ , and  $V_2$ , the length  $|V_0 V_1|$  and the angle  $\varphi_1$  are fixed in the triangle  $V_0 J V_1$ , (Fig A2), the derivative of a daughter vessel length with respect to the parent vessel length is

$$\frac{\partial l_1}{\partial l_0} = \cos \theta_2$$

**Proof:** Draw a perpendicular line passing through  $V_1$  and intersecting with the extension of  $V_0 J$  at  $O$ . Denote  $|V_0 V_1| = v_2$ ,  $|V_1 O| = y$ , and  $|JO| = x$ . When  $J$  is on the right side of  $V_0$ , we have  $v_2 \cos \varphi = x + l_0$ . Since  $v_2 \cos \varphi_1$  is fixed because  $v_2$  and  $\varphi_1$  are fixed, it follows that  $\partial(v_2 \cos \varphi) = \partial(x + l_0) = 0$ , or equivalently

$$\frac{\partial x}{\partial l_0} = -1. \quad (\text{A1})$$

Notice however that the derivative  $\frac{\partial x}{\partial l_0}$  is discontinuous when the branching junction collapses on the parent endpoint (i.e.,  $l_0 = 0$ ) as the right and left derivatives of  $x$  with respect to  $l_0$  are opposite in sign:  $\partial_+ x(0) = \frac{\partial(v_2 \cos \varphi_1 - l_0)}{\partial l_0} = -1$ ,  $\partial_- x(0) = \frac{\partial(v_2 \cos \varphi_1 + l_0)}{\partial l_0} = 1$  (Fig A2).

**Figure A2. (a)** The branching geometry of a parent and one of the daughter vessels **(b)** When the vertex  $J$  approaches the vertex  $V_0$  from the right,  $x = v_2 \cos \varphi_1 - l_0$ . **(c)** When the vertex  $J$  approaches the vertex  $V_0$  from the right,  $x = v_2 \cos \varphi_1 + l_0$ .

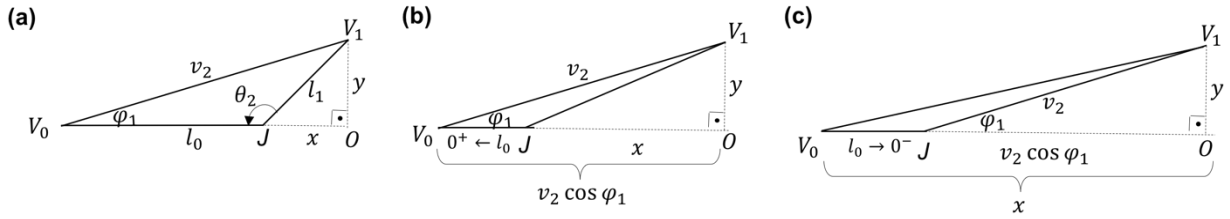

Applying the Pythagorean Theorem to the triangle  $V_1JO$ , we have  $l_1 = \sqrt{x^2 + y^2}$ , hence

$$\frac{\partial l_1}{\partial x} = \frac{x}{\sqrt{x^2 + y^2}} = \frac{x}{l_1} \quad (\text{A2})$$

Using the chain rule along with equations (A1) and (A2) gives

$$\frac{\partial l_1}{\partial l_0} = \frac{\partial l_1}{\partial x} \frac{\partial x}{\partial l_0} = -\frac{\partial l_1}{\partial x} = -\frac{x}{l_1} = -\cos(\pi - \theta_2) = \cos \theta_2$$

as desired.

**Lemma 4.** Given fixed lengths  $|V_0V_1| = v_2$  and  $l_0$  in the triangle  $V_0V_1$ , then

$$\frac{\partial l_1}{\partial \varphi_1} = -l_0 \sin \theta_2$$

**Proof:** As in Lemma 1, we have  $\cos \theta_2 = -\cos(\pi - \theta_2) = -\frac{x}{l_1}$  and  $l_1 = \sqrt{x^2 + y^2}$ . From the triangle  $V_0V_1O$ , we further have  $y = v_2 \sin \varphi_1$  and  $x = v_2 \cos \varphi_1 - l_0$ . Substituting these into the expression for  $l_1$  yields  $l_1 = \sqrt{(v_2 \cos \varphi_1 - l_0)^2 + (v_2 \sin \varphi_1)^2}$ . As  $v_2$  and  $l_0$  are fixed, differentiating  $l_1$  with respect to  $\varphi_1$  gives:

$$\frac{\partial l_1}{\partial \varphi_1} = \frac{1}{2} \frac{2(v_2 \cos \varphi_1 - l_0)(-v_2 \sin \varphi_1) + 2v_2^2 \sin \varphi_1 \cos \varphi_1}{\sqrt{(v_2 \cos \varphi_1 - l_0)^2 + (v_2 \sin \varphi_1)^2}}$$

This expression simplifies by cancelling the  $2v_2^2 \sin \varphi_1 \cos \varphi_1$  terms in the numerator and by recognizing the denominator is equal to  $l_1$ . Therefore, we obtain  $\frac{\partial l_1}{\partial \varphi_1} = \frac{l_0 v_2}{l_1} \sin \varphi_1$ .

Since  $\sin \varphi_1 = \frac{y}{v_2}$  and  $\sin(\pi - \theta_2) = \frac{y}{l_1}$ , this equation becomes

$$\frac{\partial l_1}{\partial \varphi_1} = \frac{l_0 v_2}{l_1} \sin \varphi_1 = l_0 \frac{y}{l_1} = -l_0 \sin \theta_2 \quad \blacksquare$$

With these two lemmas proven, we now return to the original optimization problem.

Unless  $J$  coincides with the unshared endpoints  $V_0, V_1$  or  $V_2$ , substituting Lemma 1 and Lemma 2 into the equality, we have

$$\nabla H = \left( \frac{\partial H}{\partial l_0}, \frac{\partial H}{\partial \varphi_1} \right) = \vec{0},$$

leads to two equations

$$h_0 = -h_1 \cos \theta_2 - h_2 \cos \theta_1 \quad (\text{A3})$$

$$h_1 \sin \theta_2 = h_2 \sin \theta_1 \quad (\text{A4})$$

77 Solving these equations yields the previously reported branching angle solutions (Eq.  
78 (1) in our paper and from Zamir et. al. (1, 2)).

79 Dividing both sides of the equations (A3) and (A4) by  $h_2$  and combining them, we  
80 have

$$81 \quad \frac{h_0}{h_2} = -\frac{\sin \theta_1 \cos \theta_2 + \sin \theta_2 \cos \theta_1}{\sin \theta_2} = \frac{-\sin(\theta_1 + \theta_2)}{\sin \theta_2}$$

82 Realizing that  $\theta_1 + \theta_2 = 2\pi - \theta_0$ , or equivalently  $-\sin(\theta_1 + \theta_2) = \sin \theta_0$ , and combining  
83 the above equations (A3) and (A4) yields  $h_0 \sin \theta_2 = h_2 \sin \theta_0$ . Thus, in order for the  
84 equations that follow from  $\nabla H = \vec{0}$  to be soluble, the expressions  $\sin \theta_0$ ,  $\sin \theta_1$ , and  $\sin \theta_2$   
85 must all have the same sign because the length scales  $h_i$  are all positive. This sign  
86 criterion can only be satisfied when the branching junction is inside of the triangle  
87 defined by  $V_0, V_1$  and  $V_2$ . Consequently, this implies  $\nabla H = \vec{0}$  cannot be satisfied when the  
88 branching junction is outside of the triangle or on the boundary of the triangle.

89 Therefore, in order for the previously reported formula for the branching-angle solutions  
90 to be valid, we need to check first if  $-1 \leq \cos \theta_i \leq 1$ , and if it does not, we must  
91 conclude that  $\nabla H = \vec{0}$  does not have a solution. Previous studies were not explicit about  
92 this criterion or distinction in finding solutions. Solving the inequalities  $-1 \leq \cos \theta_i \leq 1$   
93 for each branching angle yields necessary conditions for the existence of solutions  
94 of  $\nabla H = \vec{0}$ . These conditions reduce to the simple statement,  $h_i < h_j + h_k$ , about the  
95 weightings of the terms in the cost function for any combination of  $(i, j, k)$ . If any of these

three conditions fail, then the branching junction will be degenerate, meaning that the optimal branching junction,  $J$ , will collapse to one of the vertices.

Moreover, the angles of the triangle  $V_0V_1V_2$  further confine the range of branching angles that can be realized within the triangle, i.e.  $\widehat{V_jV_iV_k} < \theta_i$ . Hence, if branching angle solutions defined by Eq. (1) violate any of these conditions, the optimization solution will be a collapse of the branching junction onto one of the unshared endpoints.

### Appendix C. Degeneracy Solutions of Material Cost Optimization

We now derive which particular vertex the branching junction will collapse onto for the degeneracy cases.

**Lemma 5.** When the triangle conditions and inequalities do not hold (i.e.,  $h_i \geq h_j + h_k$ ), the vertex  $V_i$  associated with the largest cost parameter (i.e.,  $h_i$ ) is the solution for the material cost optimization.

**Proof:** By symmetry and without loss of generality, we assume that the cost per parent length is greater than the sum of the costs per length for the daughter vessels, i.e.  $h_0 \geq h_1 + h_2$ . To identify the vertex that yields the minimum cost, we will calculate the total cost corresponding to all three degenerate cases (Fig A1). Total costs at the corresponding vertices are given by  $H_{V_0} = h_1v_2 + h_2v_1$ ,  $H_{V_1} = h_0v_2 + h_2v_0$ , and  $H_{V_2} = h_0v_1 + h_1v_0$ , where  $v_0, v_1$ , and  $v_2$  are lengths of sides  $V_1V_2, V_0V_2, V_0V_1$  respectively. From our assumption and triangle inequality applied to the sides of the triangle  $V_0V_1V_2$ , we have  $H_{V_1} = h_0v_2 + h_2v_0 \geq (h_1 + h_2)v_2 + h_2v_0 = h_2(v_0 + v_2) + h_1v_2 > h_2v_1 + h_1v_2 = H_{V_0}$ . In a symmetric way, one can also prove that  $H_{V_2} > H_{V_1}$ , implying that  $J$  collapses on  $V_0$ .

117 **Lemma 6.** For any triangle with vertices  $X$ ,  $Y$ ,  $Z$ , and a point  $P$  inside this triangle we  
 118 have the following inequality

$$119 \quad |XY| + |YZ| > |XP| + |PZ|$$

120 **Proof:** The set of points  $Y'$  on the plane for which

$$121 \quad |XY'| + |Y'Z| = |XY| + |YZ|$$

122 forms an ellipse as illustrated in Fig A3. Therefore, for any point  $P'$  in the interior of the  
 123 ellipse

$$124 \quad |XP'| + |P'Z| < |XY| + |YZ|$$

125 proving the claim.

126 **Fig A3.** Ellipse formed by the points  $X$ ,  $Y$ , and  $Z$ . By definition, the sum of the distances  
 127 from any point on the ellipse to  $X$  and  $Z$  is fixed.

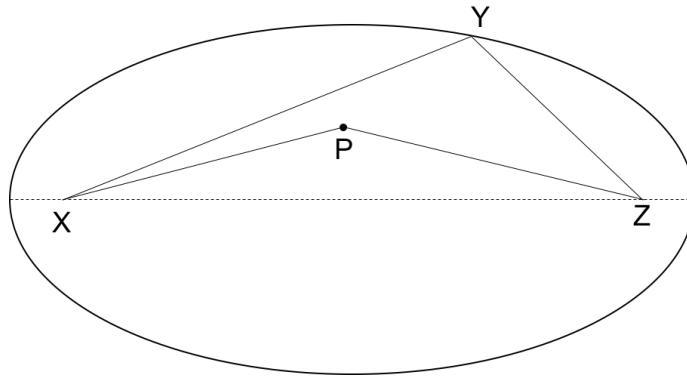

128

129 **Lemma 7.** When optimal branching angle solutions (Eq. (1)) result in a case where the  
 130 triangle condition ( $\widehat{V_j V_l V_k} \geq \theta_i$ ) fails, then the vertex associated with  $\theta_i$  for which the  
 131 inequality fails also provides the minimum of  $H$ .

**Proof:** Without loss of generality, let us assume that the optimal solution of  $\theta_0$  is less than the angle  $\widehat{V_1 V_0 V_2}$ . As  $h_0^2 = h_1^2 + h_2^2 - 2h_1 h_2 \cos(\pi - \theta_0)$ , we can form a triangle OAB with side-lengths  $h_0, h_1, h_2$  that has the angle  $\pi - \theta_0$  at the vertex A (Fig A4). Now, let us construct a triangle ABC similar to the triangle  $V_0 V_1 V_2$ . Drawing a line segment AC of length  $h_2 \frac{v_1}{v_2}$ , so that the angle  $\widehat{CAB}$  equals  $\widehat{V_0} := \widehat{V_2 V_0 V_1}$ , yields such a triangle with similarity ratio  $\frac{h_2}{v_2}$ . Hence, the side BC has length  $h_2 \frac{v_0}{v_2}$  (Fig A4). Then, the side inequality applied to the concave quadrilateral OBCA (Lemma 6) leads to  $h_0 + h_2 \frac{v_0}{v_2} > h_1 + h_2 \frac{v_1}{v_2}$ . Multiplying both sides by  $v_2$  provides  $H_{V_1} = h_0 v_2 + h_2 v_0 > h_2 v_1 + h_1 v_2 = H_{V_0}$ . In a similar manner, we can show that  $H_{V_2} > H_{V_0}$ , demonstrating that  $V_0$  gives the optimal position for  $J$ . By symmetry, when  $\theta_1 < \widehat{V_0 V_1 V_2}$  this implies the branching junction  $J$  collapses to  $V_1$ , and when  $\theta_2 < \widehat{V_1 V_2 V_0}$ , this implies that  $J$  collapses to  $V_2$ .

**Fig A4.** The diagram of the proof to show showing that when  $\theta < \widehat{V_0}$ , the branching junction  $J$  will collapse on  $V_0$ .

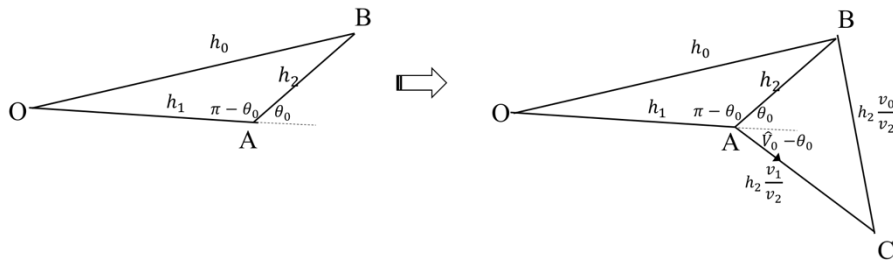

#### Appendix D. Power Cost Optimization for a Single Branching Junction Solutions

147 Here, we show that power cost optimization always leads to degenerate branching  
 148 geometry. To do this, we first calculate the equivalent impedances when the branching  
 149 junction  $J$  occurs at the vertex  $V_i$  (Fig A1)—denoted by  $Z_{V_i}$ —for each  $i$ .

$$150 \quad Z_{V_0} = \left( \frac{1}{h_1 v_2} + \frac{1}{h_2 v_1} \right)^{-1}, \quad Z_{V_1} = h_0 v_2, \quad Z_{V_2} = h_0 v_1$$

151 Now, if we show that  $Z_{eq} \geq \min(Z_{V_0}, Z_{V_1}, Z_{V_2})$ , it follows that  $Z_{eq}$  attains its minimum at  
 152 one of the vertices. Without loss of generality, we assume that  $v_1 \leq v_2$ , so  $Z_{V_2} \leq Z_{V_1}$   
 153 and  $\min(Z_{V_0}, Z_{V_1}, Z_{V_2}) = \min(Z_{V_0}, Z_{V_2})$ . The following lemmas verify our claim that one of  
 154 the vertices is always optimal for the branching junction.

155 **Lemma 8.** Let  $Z_{V_0} < Z_{V_2}$ . Then,  $\min(Z_{eq}) = Z_{V_0}$

156 **Proof:** To prove the lemma, we need to show that  $Z_{eq} \geq Z_{V_0}$  for all possible locations of  
 157 the branching junction,  $J$ . Because  $Z_{V_0} < Z_{V_2}$ , we have  $h_0 > \frac{1}{v_1} \left( \frac{1}{h_1 v_2} + \frac{1}{h_2 v_1} \right)^{-1}$ , so we can  
 158 form the following inequality by replacing  $h_0$  by  $\left( \frac{1}{h_1 v_2} + \frac{1}{h_2 v_1} \right)^{-1} \frac{1}{v_1}$

$$159 \quad Z_{eq} = h_0 l_0 + \left( \frac{1}{h_1 l_1} + \frac{1}{h_2 l_2} \right)^{-1} > \left( \frac{1}{h_1 v_2} + \frac{1}{h_2 v_1} \right)^{-1} \frac{l_0}{v_1} + \left( \frac{1}{h_1 l_1} + \frac{1}{h_2 l_2} \right)^{-1}$$

160 To prove  $Z_{eq} \geq Z_{V_0} = \left( \frac{1}{h_1 v_2} + \frac{1}{h_2 v_1} \right)^{-1}$ , it suffices to prove

$$161 \quad \left( \frac{1}{h_1 v_2} + \frac{1}{h_2 v_1} \right)^{-1} \frac{l_0}{v_1} + \left( \frac{1}{h_1 l_1} + \frac{1}{h_2 l_2} \right)^{-1} \geq \left( \frac{1}{h_1 v_2} + \frac{1}{h_2 v_1} \right)^{-1}$$

162 Rearranging terms, the proof of the Lemma boils down to proving the inequality

$$\left(\frac{1}{h_1 l_1} + \frac{1}{h_2 l_2}\right)^{-1} > \left(1 - \frac{l_0}{v_1}\right) \left(\frac{1}{h_1 v_2} + \frac{1}{h_2 v_1}\right)^{-1}, \quad (\text{A5})$$

163 Taking the reciprocal of both sides of (A5) and factoring out the terms with  $\frac{1}{h_1}$  and  $\frac{1}{h_2}$ , this  
 164 inequality is equivalent to

$$165 \quad \frac{1}{h_1} \left( \frac{1}{l_1} - \frac{1}{v_2} \left(1 - \frac{l_0}{v_1}\right)^{-1} \right) + \frac{1}{h_2} \left( \frac{1}{l_2} - \frac{1}{v_1} \left(1 - \frac{l_0}{v_1}\right)^{-1} \right) < 0$$

166 Hence, if we show that both of the terms in the above expression are negative, then  
 167 their sum would also be negative, and the proof will be complete. In other words, it  
 168 suffices to show two inequalities

$$\frac{1}{l_1} - \frac{1}{v_2} \left(1 - \frac{l_0}{v_1}\right)^{-1} < 0 \quad (\text{A6})$$

$$\frac{1}{l_2} - \frac{1}{v_1} \left(1 - \frac{l_0}{v_1}\right)^{-1} < 0 \quad (\text{A7})$$

169 Observe that the triangle inequality applied to the triangle  $V_0 \mathcal{V}_1$  gives  $l_0 + l_1 > v_2$ , hence  
 170  $\frac{l_1}{v_2} > 1 - \frac{l_0}{v_2} > 1 - \frac{l_0}{v_1}$ , proving (A6). Moreover, the triangle inequality applied to the triangle  
 171  $V_0 \mathcal{V}_2$  yields  $l_0 + l_2 > v_1$ , implying that  $\frac{l_2}{v_1} > 1 - \frac{l_0}{v_1}$ , which proves (A7). ■

172 The next lemma takes care of the complementary case.

173 **Lemma 9:** Let  $Z_{V_0} > Z_{V_2}$ , then  $\min Z_{eq} = Z_{V_2}$

174 **Proof:** Following the same idea as in the proof of Lemma 8, we want to show that  $Z_{eq} \geq$

175  $Z_{V_2}$ , or equivalently

$$\left( \frac{1}{h_1 l_1} + \frac{1}{h_2 l_2} \right)^{-1} > h_0 (v_1 - l_0)$$

By the inequality (A5), we proved in Lemma 1, we have

$$\left( \frac{1}{h_1 l_1} + \frac{1}{h_2 l_2} \right)^{-1} > \left( 1 - \frac{l_0}{v_1} \right) \left( \frac{1}{h_1 c} + \frac{1}{h_2 v_1} \right)^{-1}$$

The assumption  $\left( \frac{1}{h_1 v_2} + \frac{1}{h_2 v_1} \right)^{-1} > h_0 v_1$  further yields that

$$\left( \frac{1}{h_1 l_1} + \frac{1}{h_2 l_2} \right)^{-1} > \left( 1 - \frac{l_0}{v_1} \right) h_0 v_1 = h_0 (v_1 - l_0)$$

as desired. ■

With Lemmas 8 and 9, we proved that the branching junction collapses onto one of the vertices for any choice of cost parameters  $h_0$ ,  $h_1$ , and  $h_2$ .

## Appendix E. Enlarged Consideration of the Power Cost Optimization to Go

### Beyond a Single Branching

In this section, we add terms  $c_1$  and  $c_2$  to the calculation of  $\tilde{Z}_{eq}$  to respectively represent the impedance of all of the vessels are downstream from each daughter vessel at that branching junction. Furthermore, we consider the special case that impedance matching—the impedance of the parent vessel is matched by the equivalent impedances of the daughter vessels—is satisfied throughout the whole network. By requiring that siblings have identical impedances and that each sibling has the same number of downstream vessels, we show that the ratio  $\frac{c_i}{Z_i}$  is larger for vessels that are near to the first branching level (i.e., the heart). To simplify the calculations, we

194 enumerate the levels such that the level number increases from capillary (level 0) to the  
 195 heart (level N). This is the reverse of the labeling used in most models.

196 By applying impedance matching successively from level 0 to level  $k$ , we first  
 197 recognize that the impedance of the vessel at the  $k^{\text{th}}$  level is given by  $Z_0/2^k$ , where  
 198  $Z_0$  denotes the impedance of the capillary. Moreover, for the first few levels above the  
 199 capillary level (when  $k = 0, 1, 2$ ), we find that the downstream impedance at level  $k$   
 200 follows the form  $\frac{kZ}{2^k}$  (Fig A5). The next Lemma generalizes this formula for all levels  $k$ .

201 **Lemma 10.** The downstream impedance from a daughter vessel at level  $k$  is given by

202 
$$c_k = \frac{kZ_0}{2^k}$$

203 **Proof:** We prove this claim by induction. Note that a vessel at level  $k - 1$  is in series  
 204 with the downstream vessels as illustrated in the Fig A5. If the downstream impedance  
 205 at level  $(k - 1)$  is equal to  $\frac{(k-1)Z}{2^{k-1}}$ , then by rules of fluid mechanics, the downstream  
 206 impedance at level  $k$  is given by

207 
$$c_k = \frac{1}{\frac{1}{\frac{Z_0}{2^{k-1}} + \frac{(k-1)Z_0}{2^{k-1}}} + \frac{1}{\frac{Z_0}{2^{k-1}} + \frac{(k-1)Z_0}{2^{k-1}}}} = \frac{kZ_0}{2^k}. \blacksquare$$

208 Hence, by Lemma 9, we have that the value of  $c_k/Z_k$  at level  $k$  is equal to

209 
$$\frac{\frac{kZ_0}{2^k}}{\frac{Z_0}{2^k}} = k$$

so that the value of this ratio increases with the level (i.e., increase from the capillaries to the heart). Therefore, near the heart, the constants ( $c_i$ ) representing the downstream impedances in the optimization scheme are relatively large compared to the impedances ( $Z_i$ ) of the daughter vessels at that branching junction.

**Figure A5. (a)** Perfectly-balanced branching network with identical daughter impedances and **(b)** inclusion of impedances for downstream vessels in entire branching network and thus beyond just the branching level  $k$ .

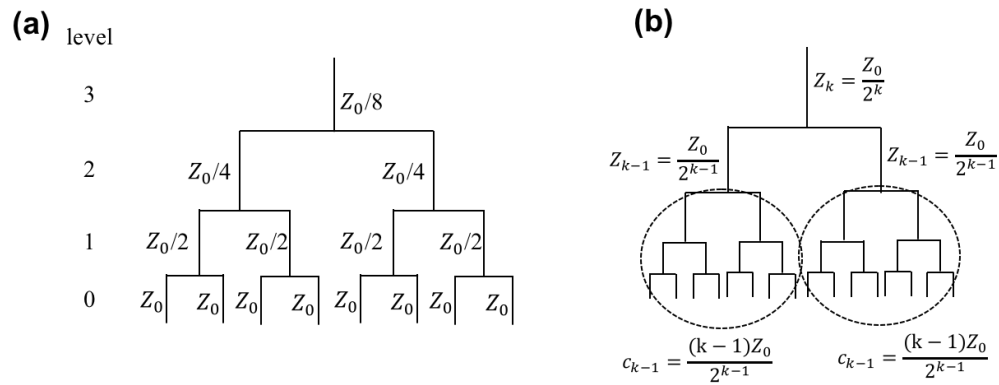

## References

1. Zamir M. Nonsymmetrical bifurcations in arterial branching. The Journal of general physiology. 1978;72(6):837-45.
2. Zamir M. Optimality principles in arterial branching. Journal of Theoretical Biology. 1976;62(1):227-51.
3. Murray CD. The physiological principle of minimum work applied to the angle of branching of arteries. The Journal of general physiology. 1926;9(6):835-41.
